# Supplementary material for: Surface Interaction of Ionic Liquids: Stabilization of Polyethylene Terephthalate-Degrading Enzymes in Solution
Source: Molecules. 2021 Dec 26;27(1):119. doi: 10.3390/molecules27010119 (PMC8746539; doi:10.3390/molecules27010119)
Supplement: Supplementary file 1 [file molecules-27-00119-s001.zip › molecules-1511218-SM.pdf]

## Supplementary date

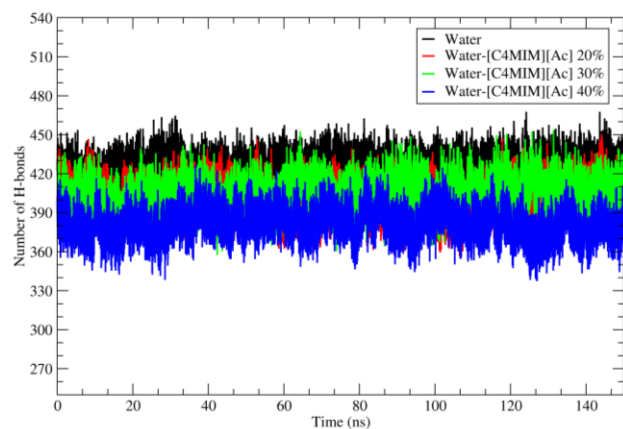

(A)

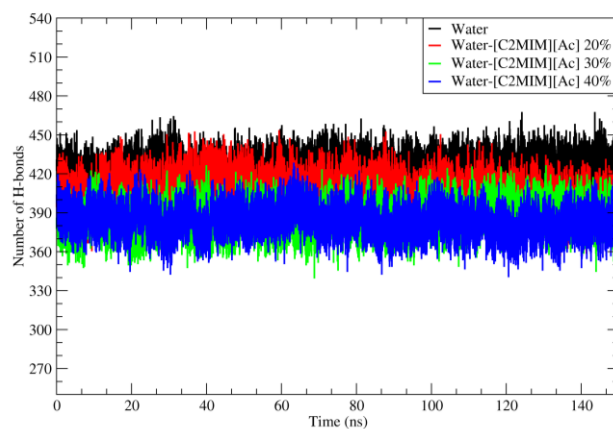

(B)

**Figure S1.** Number of hydrogen bonds between amino acids of PETase and solvents. (A); pure water in black, in red 20% of solvent Water-[C4MIM][Ac], in green 30% of solvent Water-[C4MIM][Ac] and in blue 40% of solvent Water-[C4MIM][Ac]. (B); pure water in black, in red 20% of solvent Water-[C2MIM][Ac], in green 30% of solvent Water-[C2MIM][Ac] and in blue 40% of solvent Water-[C2MIM][Ac].

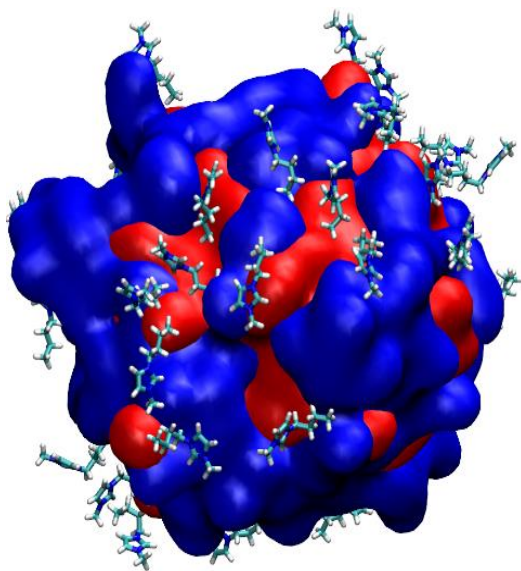

(A)

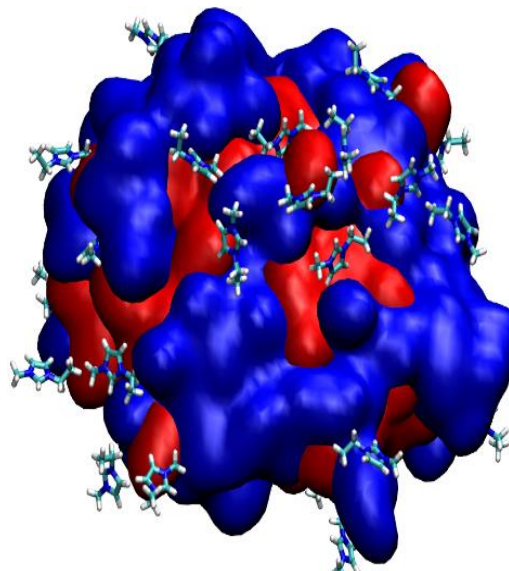

(B)

**Figure S2.** The interaction of [C4MIM] (A) and [C2MIM] (B) cations with hydrophobic surface of PETase. The hydrophobic surface is colored in red and the hydrophilic surface is colored in blue.

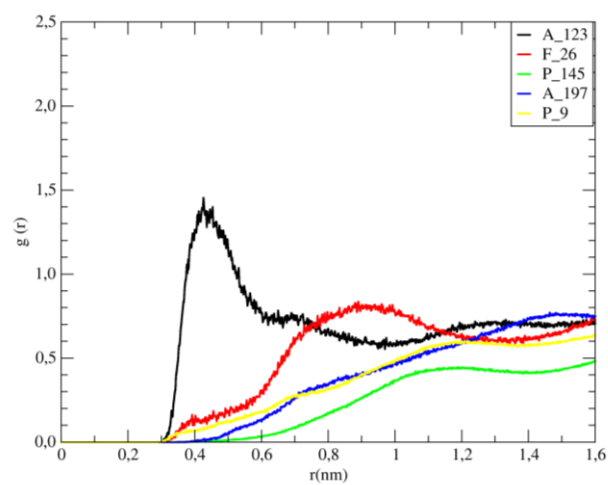

(A)

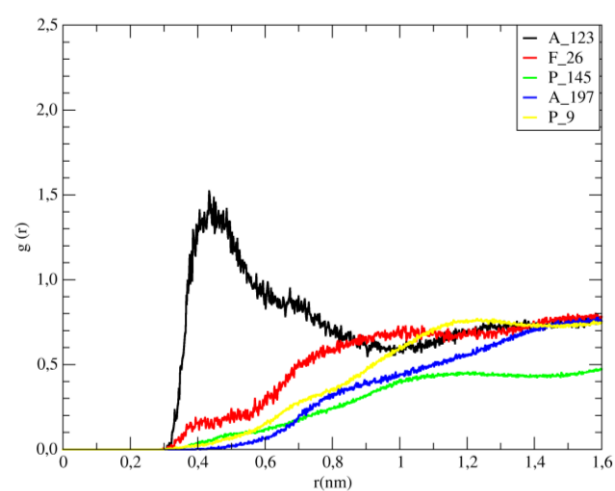

(B)

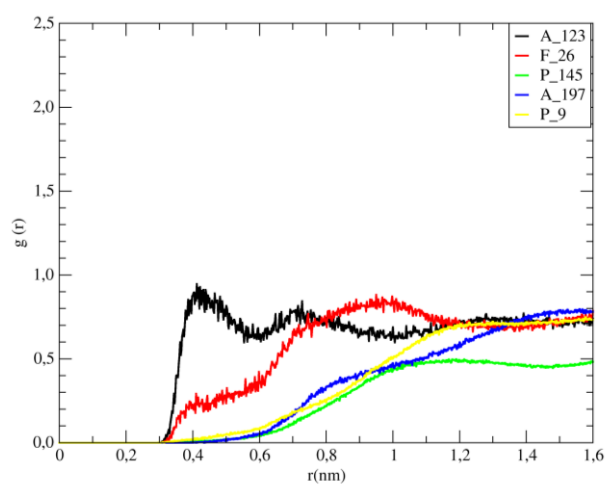

(C)

**Figure S3.** Radia distribution functions (RDFs) for atoms with (A) side chain of amino acids A123 (in black), A11 (in red), F232 (in green), P9 (in blue) and F162 (in yellow) of hydrophobic surface of PETase and ring of [C4MIM] in 40% of [C4MIM][Ac]. (B); side chain of amino acids A123, A11, F232, P9 and F162 of hydrophobic surface of PETase and ring of [C4MIM] in 30% of [C4MIM][Ac]. (C); side chain of amino acids A123, A11, F232, P9 and F162 of hydrophobic surface of PETase and ring of [C4MIM] in 20% of [C4MIM][Ac].

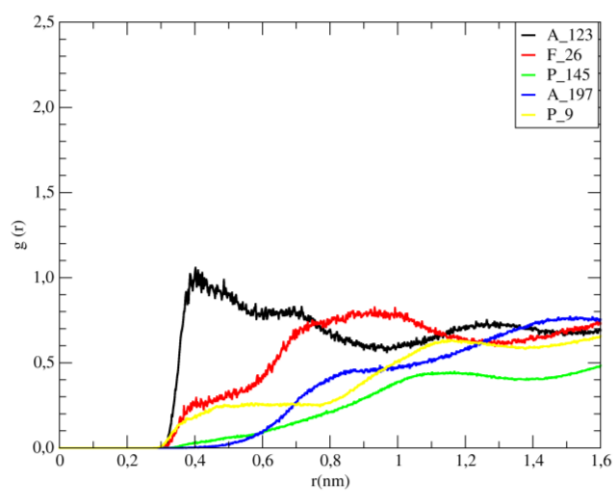

(A)

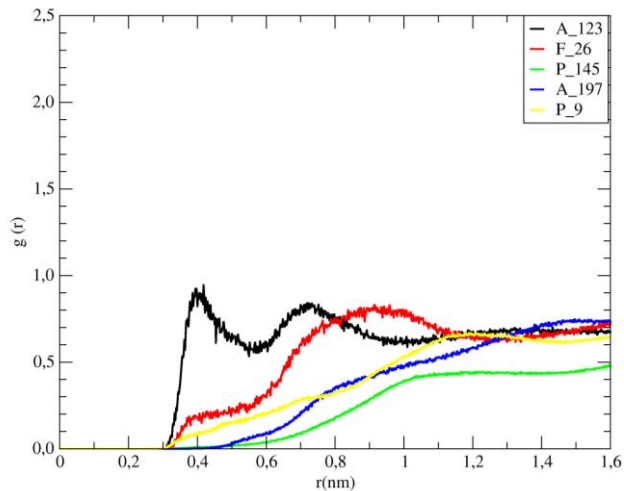

(B)

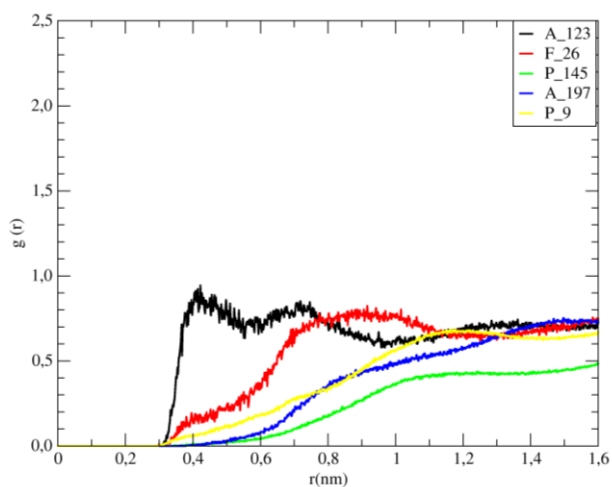

(C)

**Figure S4.** Radia distribution functions (RDFs) for atoms with (A) side chain of amino acids A123 (in black), A11 (in red), F232 (in green), P9 (in blue) and F162 (in yellow) of hydrophobic surface of PETase and ring of [C2MIM] in 40% of [C2MIM][Ac]. (B); side chain of amino acids A123, A11, F232, P9 and F162 of hydrophobic surface of PETase and ring of [C2MIM] in 30% of [C2MIM][Ac]. (C); side chain of amino acids A123, A11, F232, P9 and F162 of hydrophobic surface of PETase and ring of [C2MIM] in 20% of [C2MIM][Ac].
